# Supplementary material for: Toward a Procedure for the Template Free Growth of Te Nanowires Across an Insulator by Electrodeposition
Source: PubMed Central journal article supplement (PMC11533211; doi:10.1021/acs.jpcc.4c05915), 2024-10-22
Supplement: jp4c05915_si_001.pdf [file jp4c05915_si_001.pdf]

## Towards a Procedure for the Template Free Growth of Te Nanowires Across an Insulator by Electrodeposition

Alexander W. Black,<sup>a</sup> Nema M. Abdelazim,<sup>b\*</sup> Yasir J. Noori,<sup>b</sup> Yisong Han,<sup>c</sup> Nikolay Zhelev,<sup>a</sup> Shibin Thomas,<sup>a</sup> Wenjian Zhang,<sup>a</sup> Gillian Reid,<sup>a</sup> Richard Beanland,<sup>c</sup> C. H. Kees De Groot,<sup>b</sup> Philip N. Bartlett<sup>a\*</sup>

<sup>a</sup>School of Chemistry, University of Southampton, Southampton, SO17 1BJ, UK,

<sup>b</sup>School of Electronics and Computer Science, University of Southampton, SO17 1BJ, UK, <sup>c</sup>Department of Physics, University of Warwick, Coventry, CV4 7AL, UK

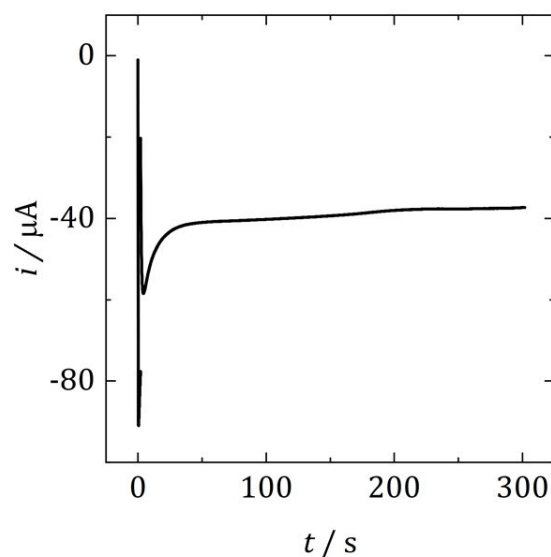

Figure S1: representative current transient for the electrodeposition of Te NWs obtained using an electrolyte composed of 0.75 mM  $[\text{N}^n\text{Bu}_4]_2[\text{TeCl}_6]$  and 100 mM BMP-I in  $\text{CH}_2\text{Cl}_2$ . The potential was stepped to -1.75 V for 2 s then to -0.4 V for 300 s. WE: TiN lateral growth substrate, CE: Pt disc, RE: Ag/AgCl.

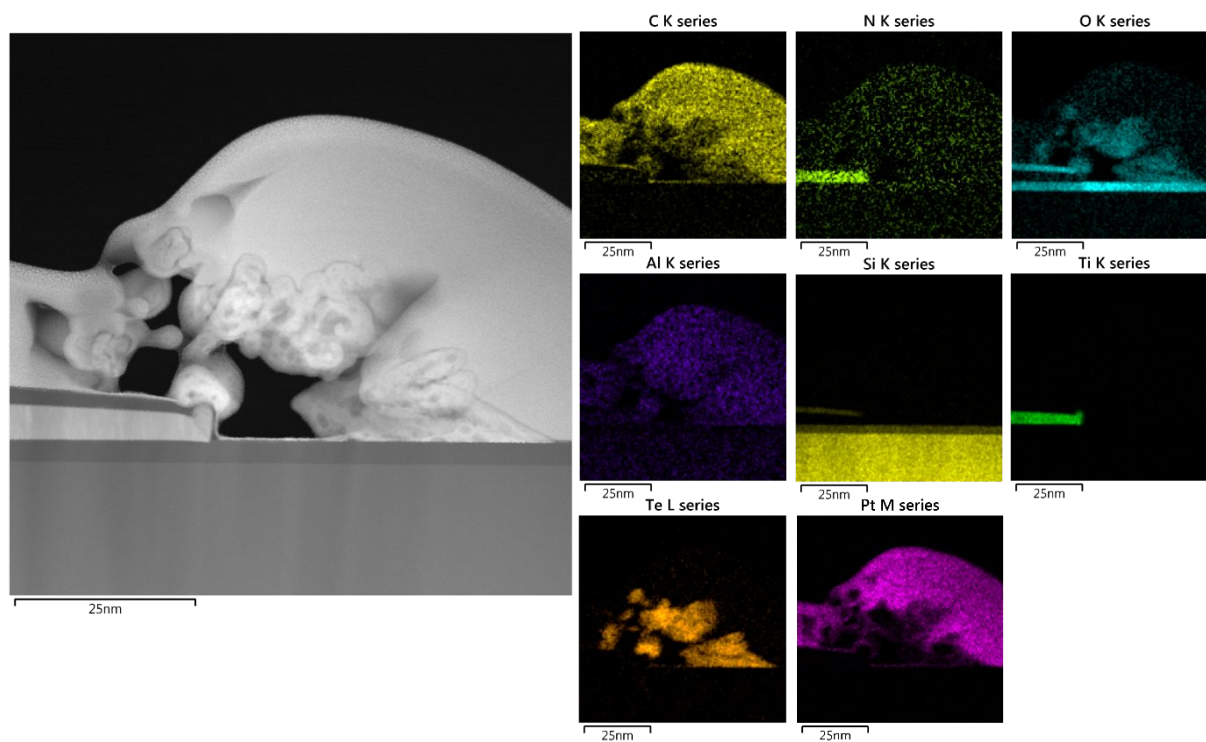

Figure S2: STEM cross-section of electrodeposited Te NWs, along with EDX mapping showing the elemental composition at each location.

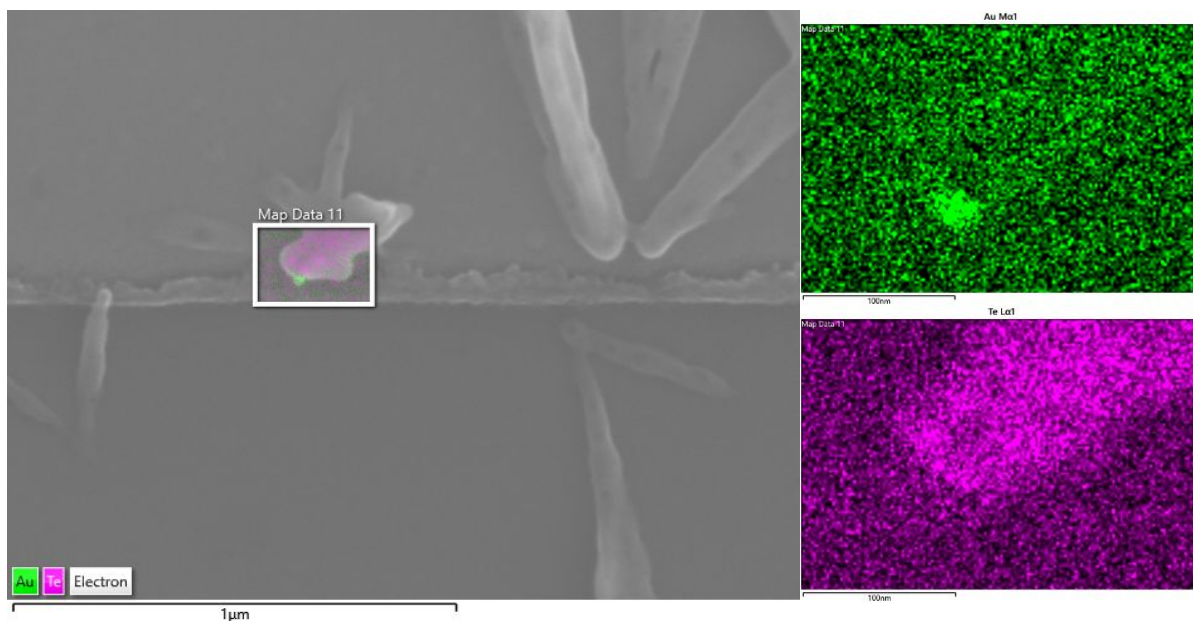

Figure: S3: EDS map showing Te growth directly from pre-treated Au.

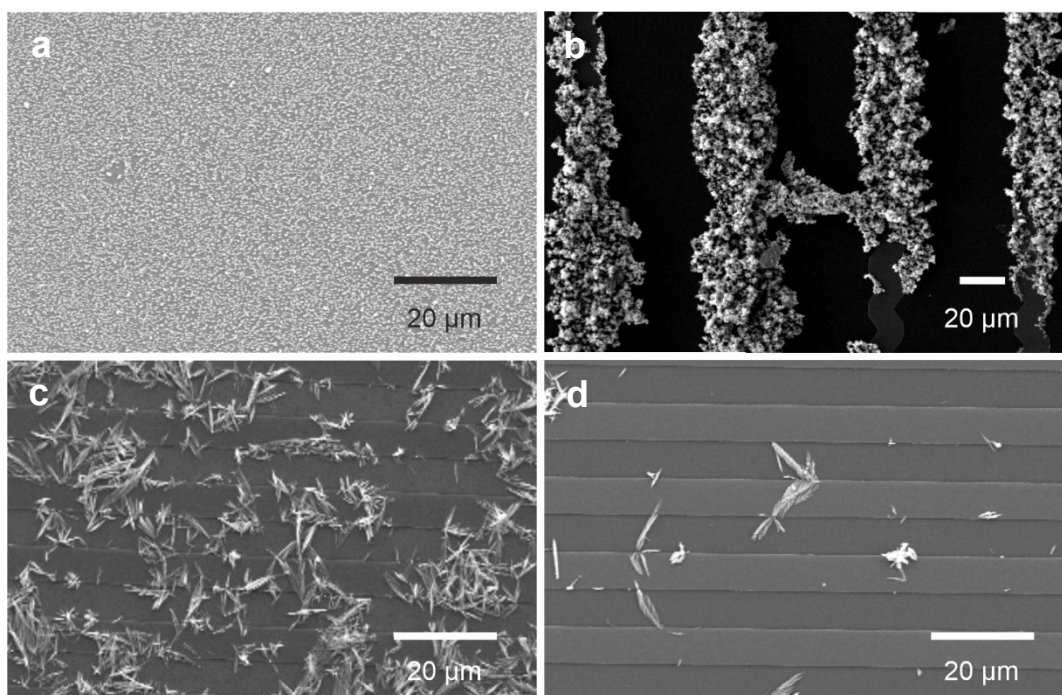

Figure S4: SEM images showing the effect of removing various experimental steps on the electrodeposition of Te NWs. a) without a lateral growth substrate, deposited onto a disc electrode, b) without BMP-I, deposited with 100 mM  $[N^nBu_4]Cl$  as the supporting electrolyte, c) without Au pre-treatment, d) without a nucleation pulse.

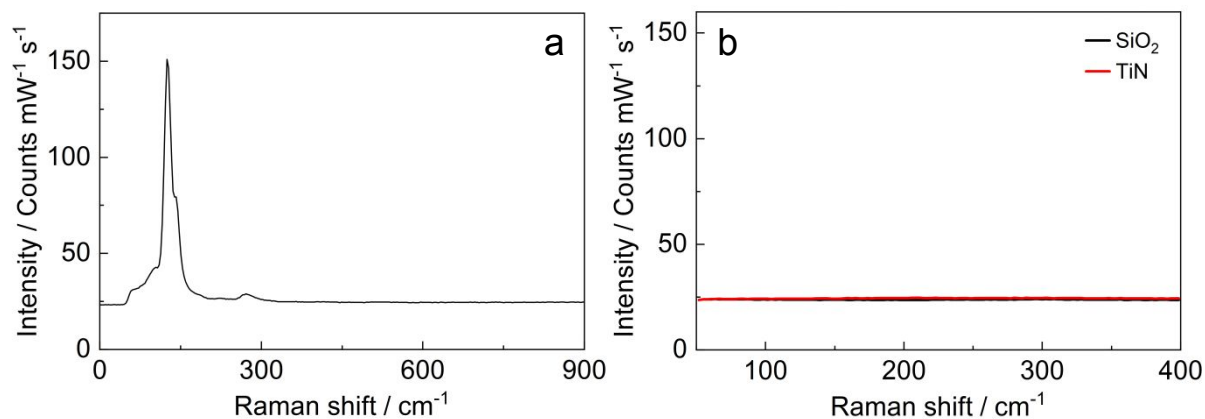

Figure S5: representative Raman spectra of a) wider range of electrodeposited Te, b) regions of  $\text{SiO}_2$  and TiN on lateral growth substrates. collected with a 532 nm laser.

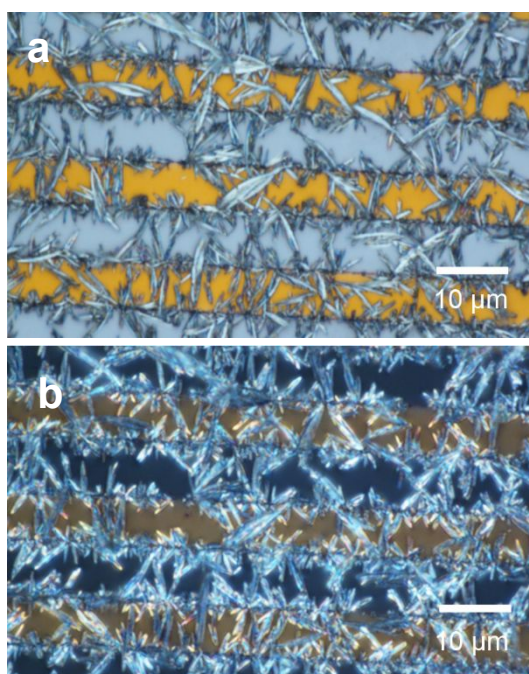

Figure S6: The effect of polarized light on optical micrographs of electrodeposited Te NWs with a) unpolarized and b) cross-polarized light.
